# Supplementary material
Source: Springer Nature journal article supplement (https://cannabishub.eu/wp-content/uploads/2026/04/42238_2026_413_MOESM1_ESM.pdf)

# Original images for blots

**The upper images** represent the uncropped chemiluminescent blot image corresponding with the images placed in the manuscript.

**The lower images** represent the stain-free blot image of the same membrane after transfer which is used for creating a multichannel image (overlaid view) to normalize data.

**Loading order:** control (C), control+cannabidiol (C+CBD), high-fat diet (HFD), high-fat diet + cannabidiol (HFD+CBD).

15-LO

75 kDa

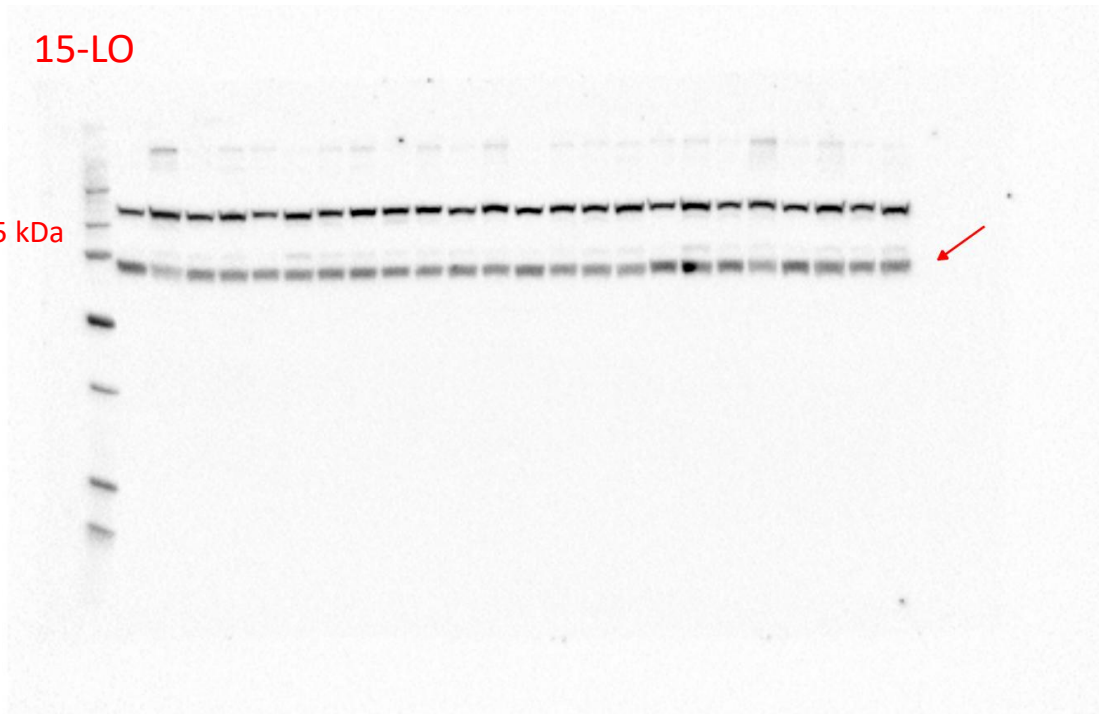

COX-1

75 kDa

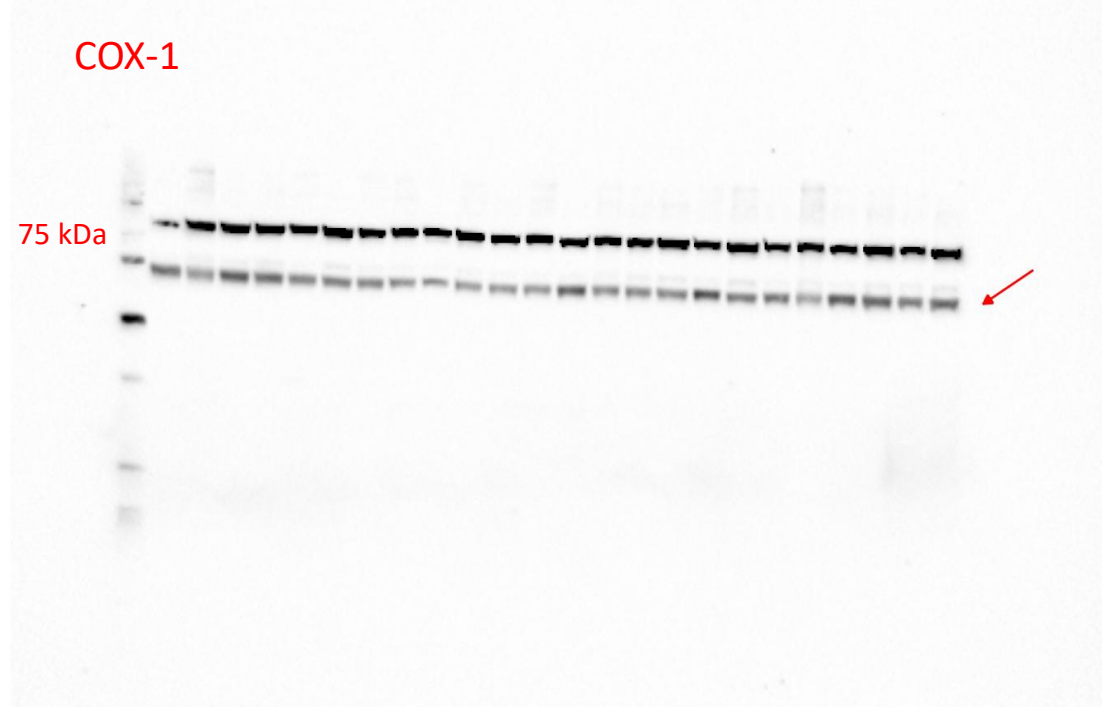

Total protein to 15-LO

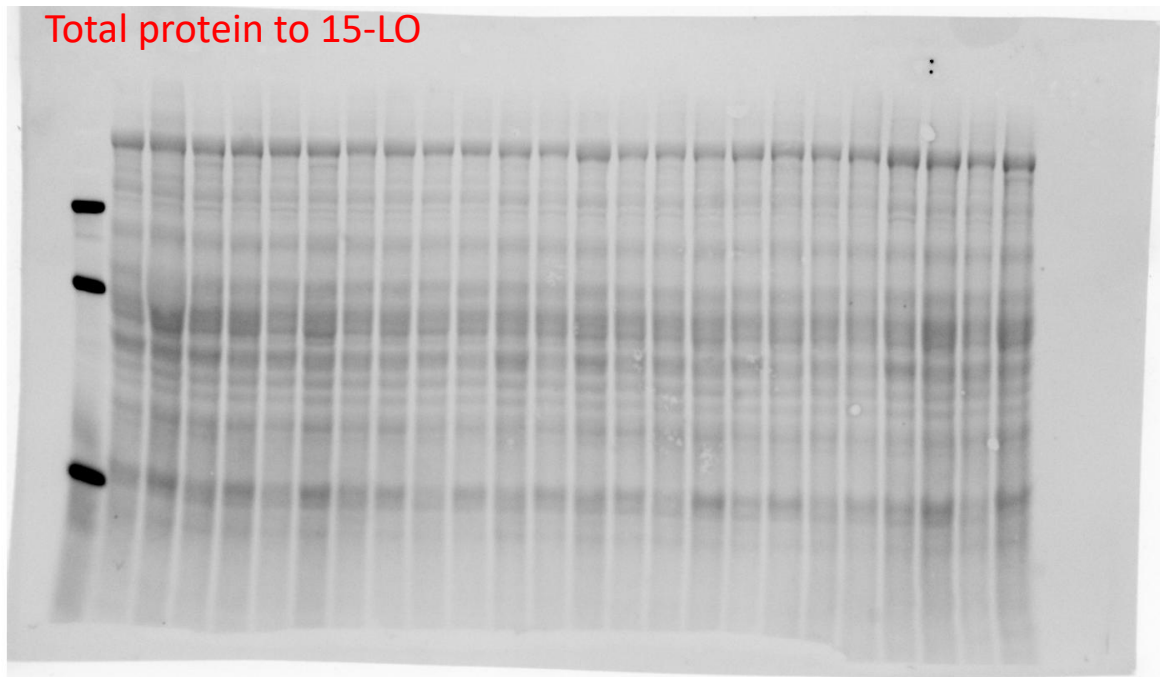

Total protein to COX-1

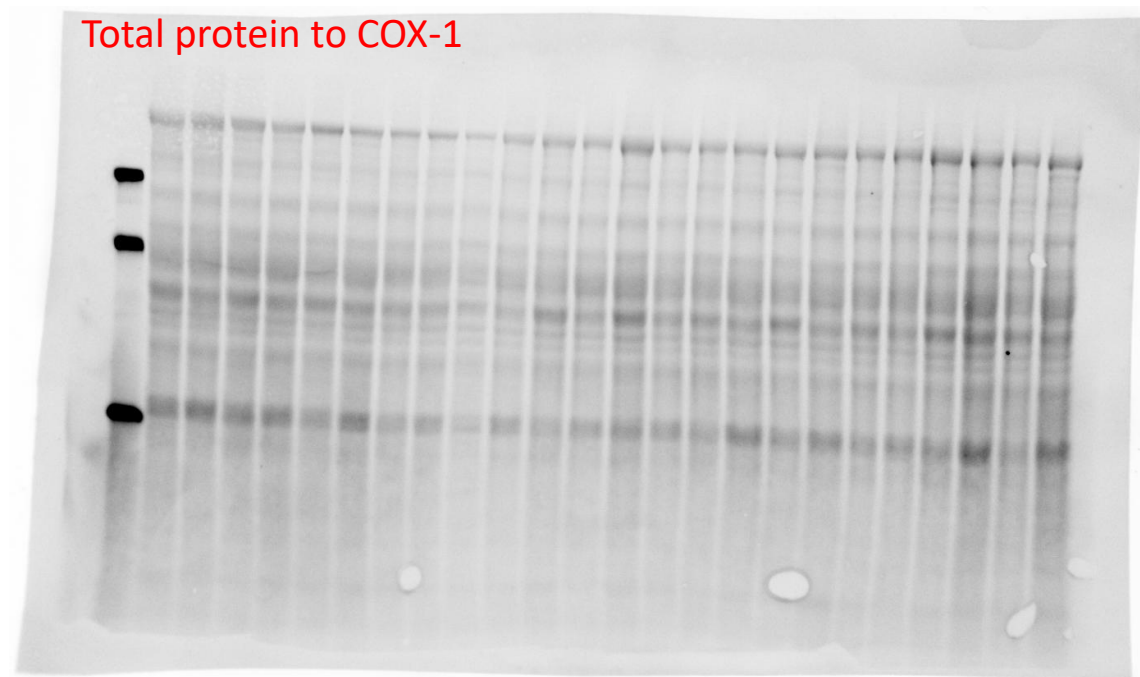

COX-2

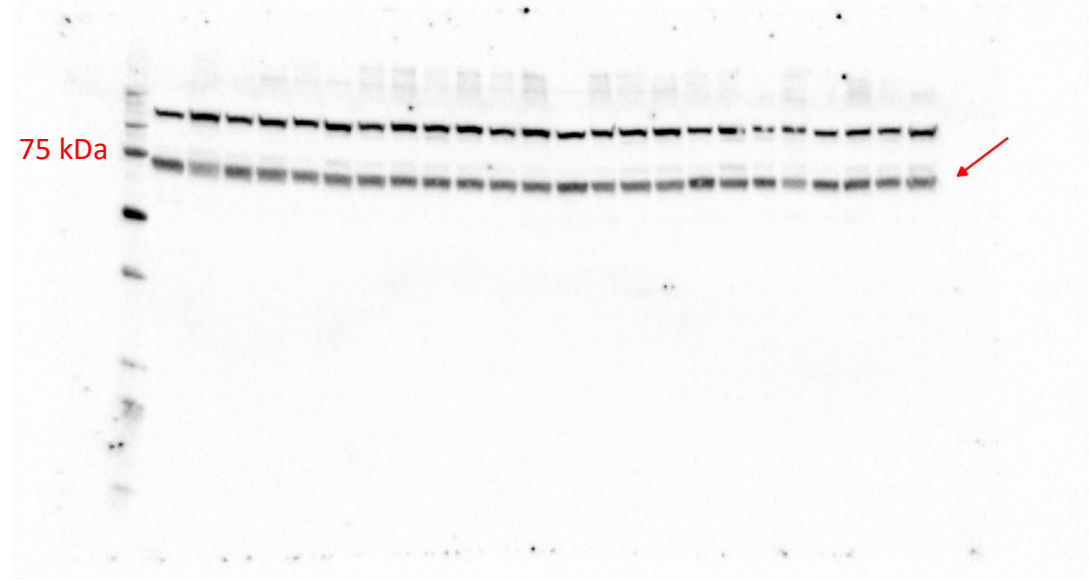

5-LO

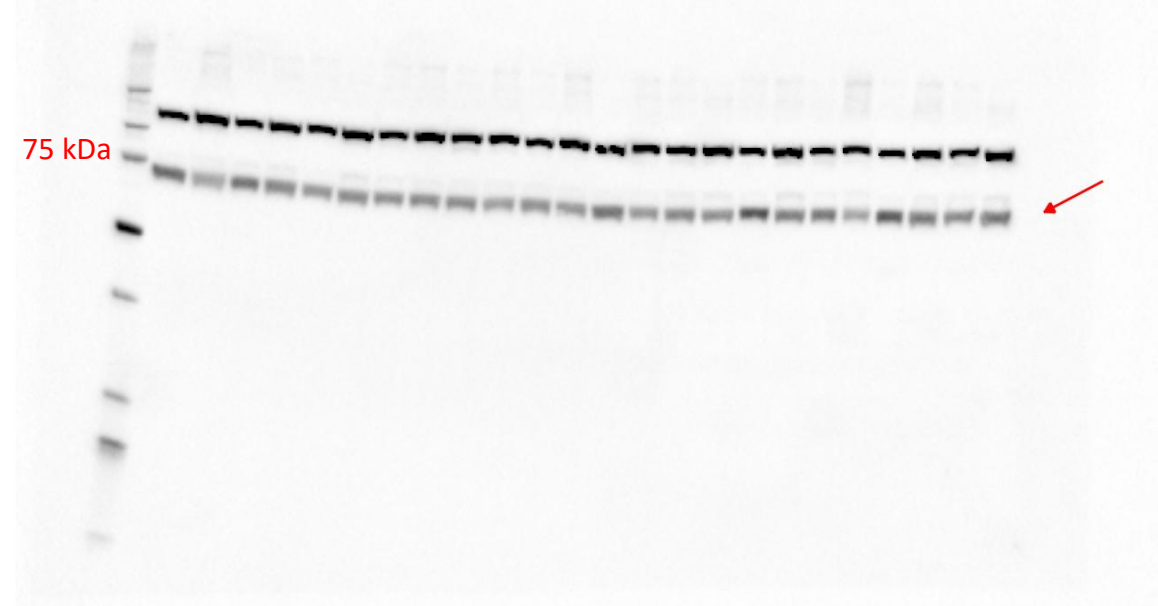

Total protein to COX-2

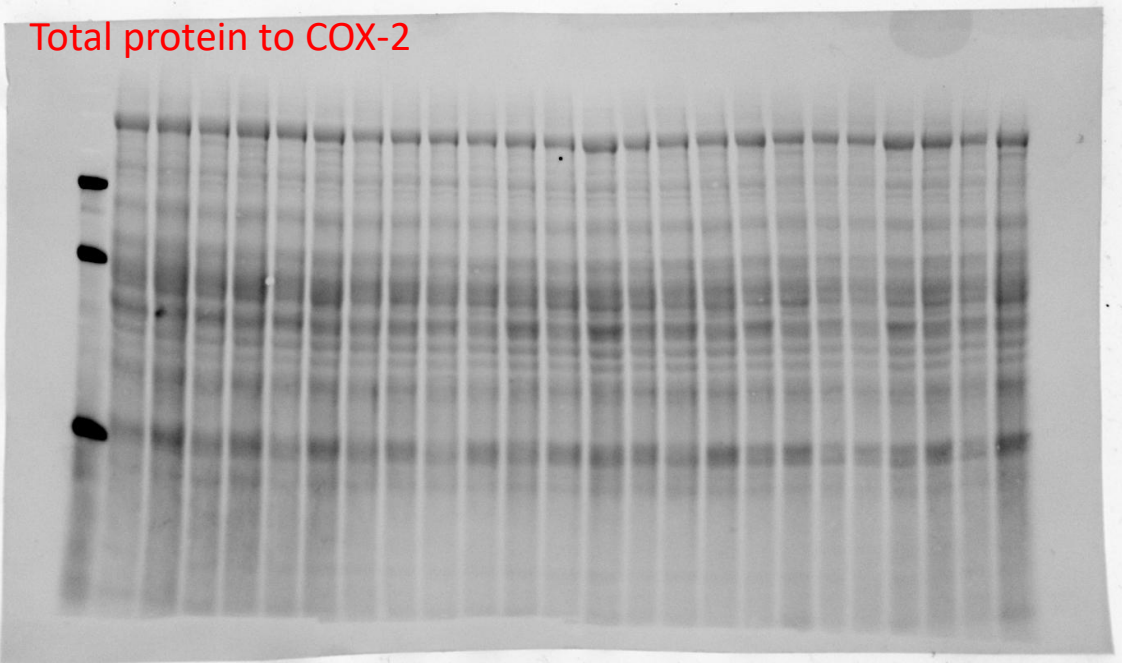

Total protein to 5-LO

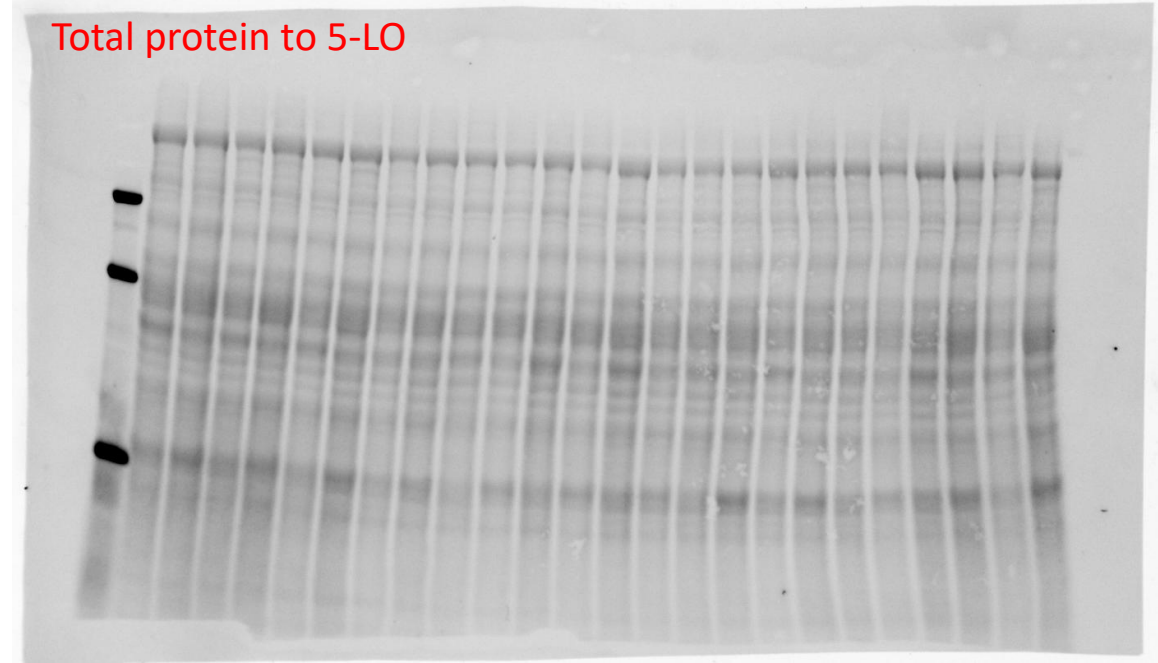

pNRF2

75 kDa

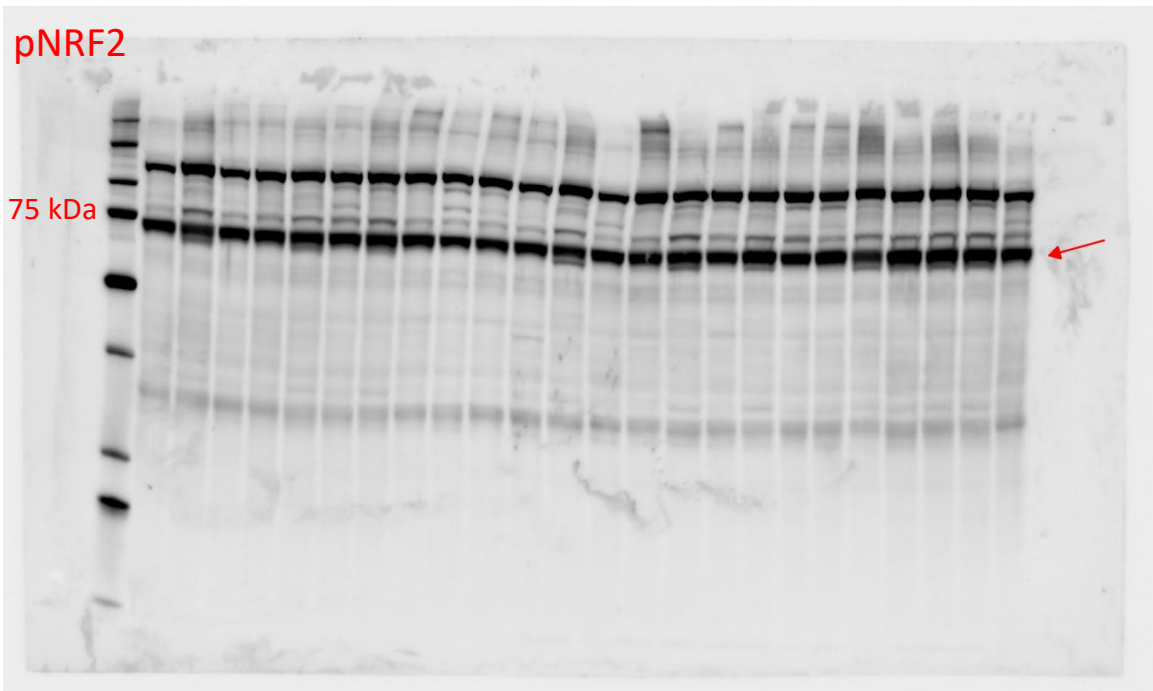

Total protein to pNRF2

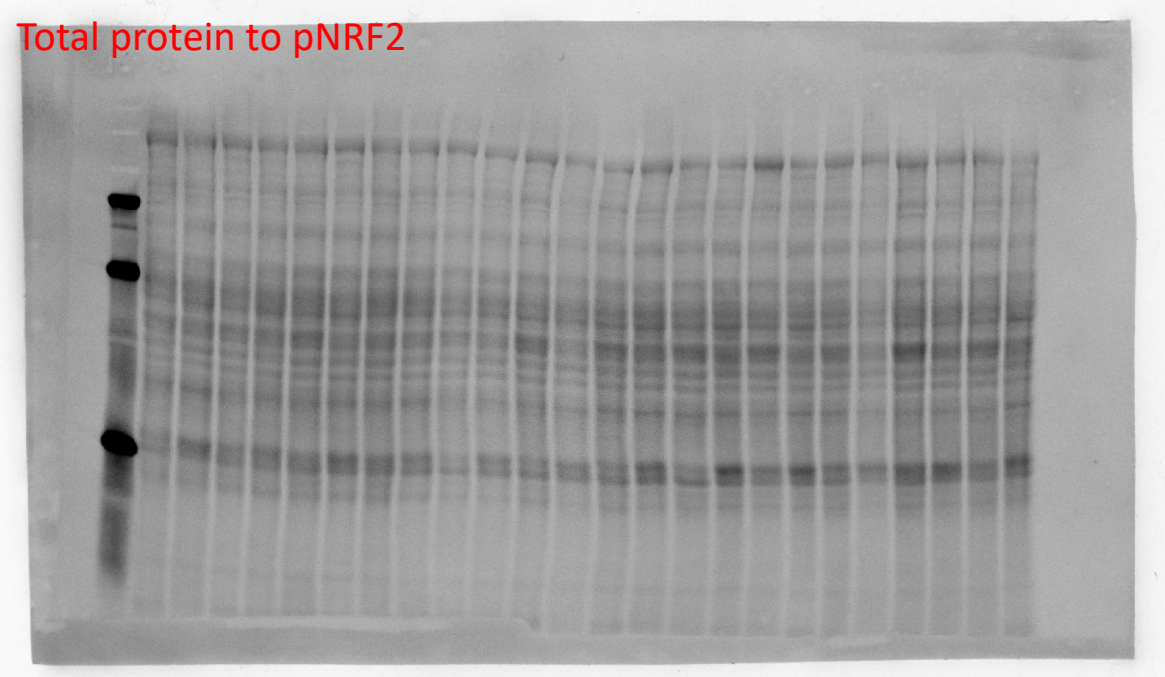

Supplement: MOESM1 [file 42238_2026_413_MOESM1_ESM.pdf]
